# Supplementary material for: Exploration of Deregulated Long Non-Coding RNAs in Association with Hepatocarcinogenesis and Survival
Source: MDPI journal article supplement (doi:10.3390/cancers7030865), 2015-09-10
Supplement: s1 [file s1]

## Supplementary Materials

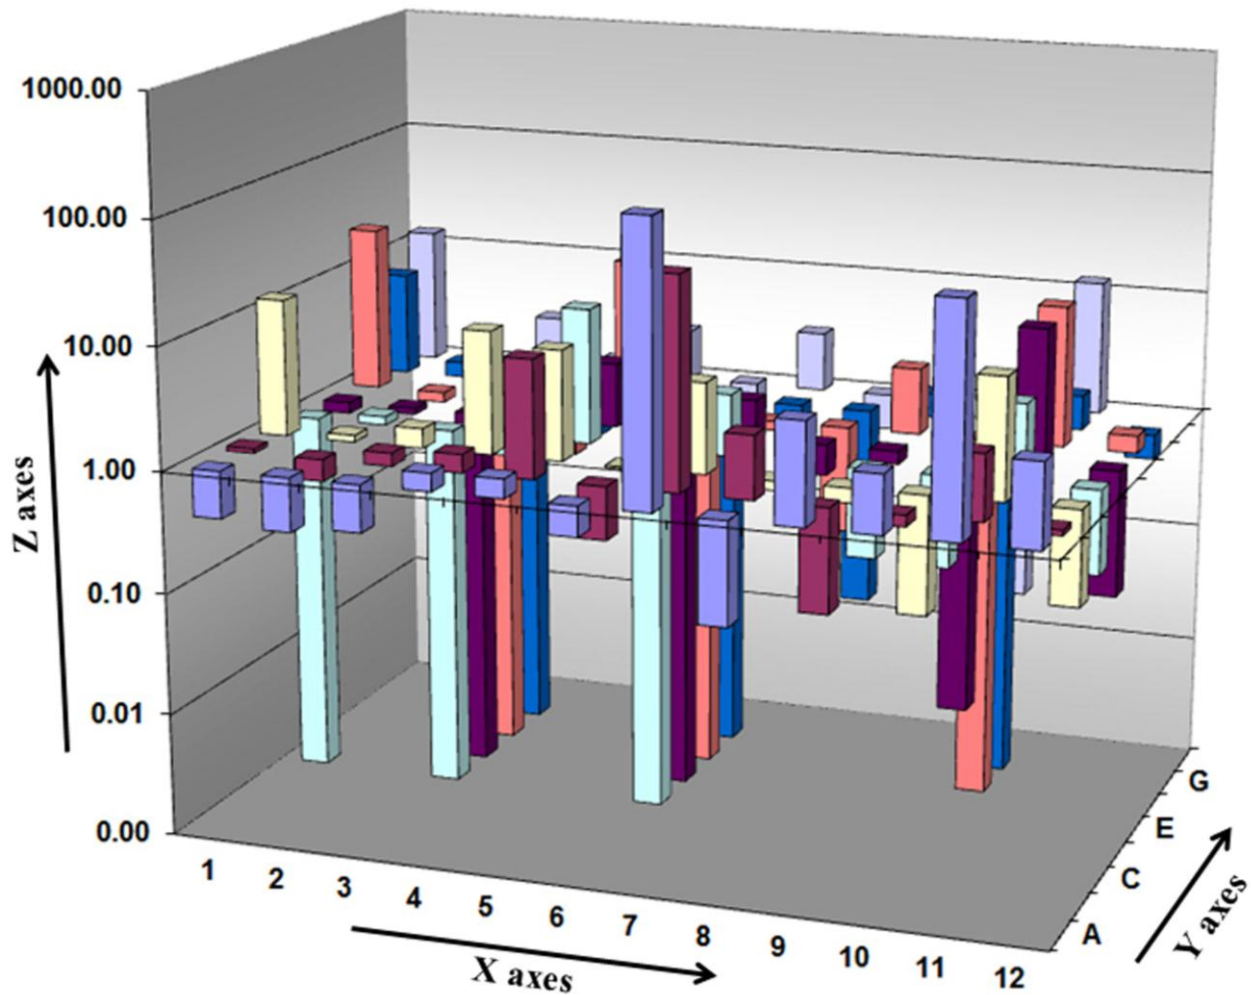

**Figure S1.** A representative example of the fold changes in expression of lncRNAs between tumor (ID: 6236) and adjacent non-tumor tissues (ID: 6235). X axis (1–12) indicates the column location of specific lncRNA. Y axis (A–H) indicates the line location of specific lncRNA. Z axis (0–1000) indicates the fold change of lncRNA between tumor and paired non-tumor tissues. There is a wide range in variations of expression between tumor and non-tumor tissues, indicating the potential usefulness of aberrant lncRNAs as tumorigenic biomarker.

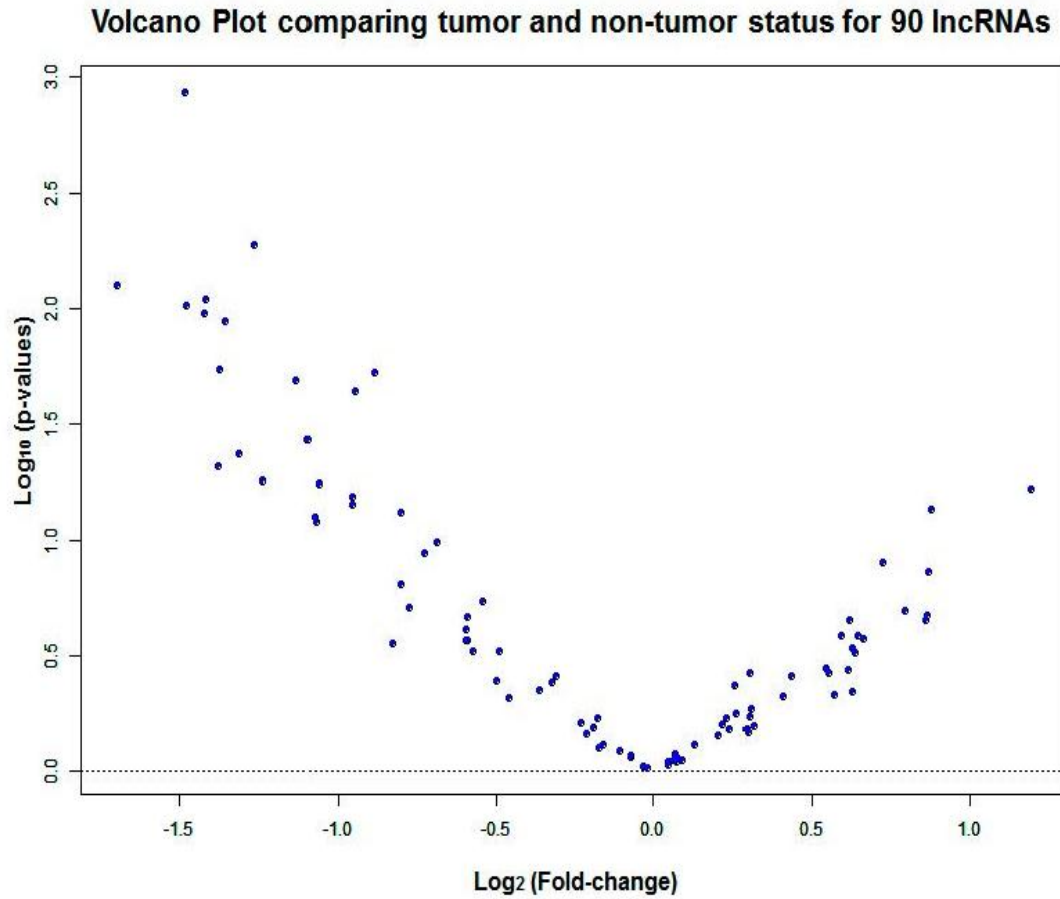

**Figure S2.** Volcano Plot comparing tumor and non-tumor status for 90 lncRNAs. Over 60% (55/90) of the lncRNAs were detectable in over 90% of liver tissues, suggesting the abundance of lncRNAs expression. Many lncRNAs were down-regulated in tumor tissue, while a few lncRNAs were up-regulated in tumor tissue.

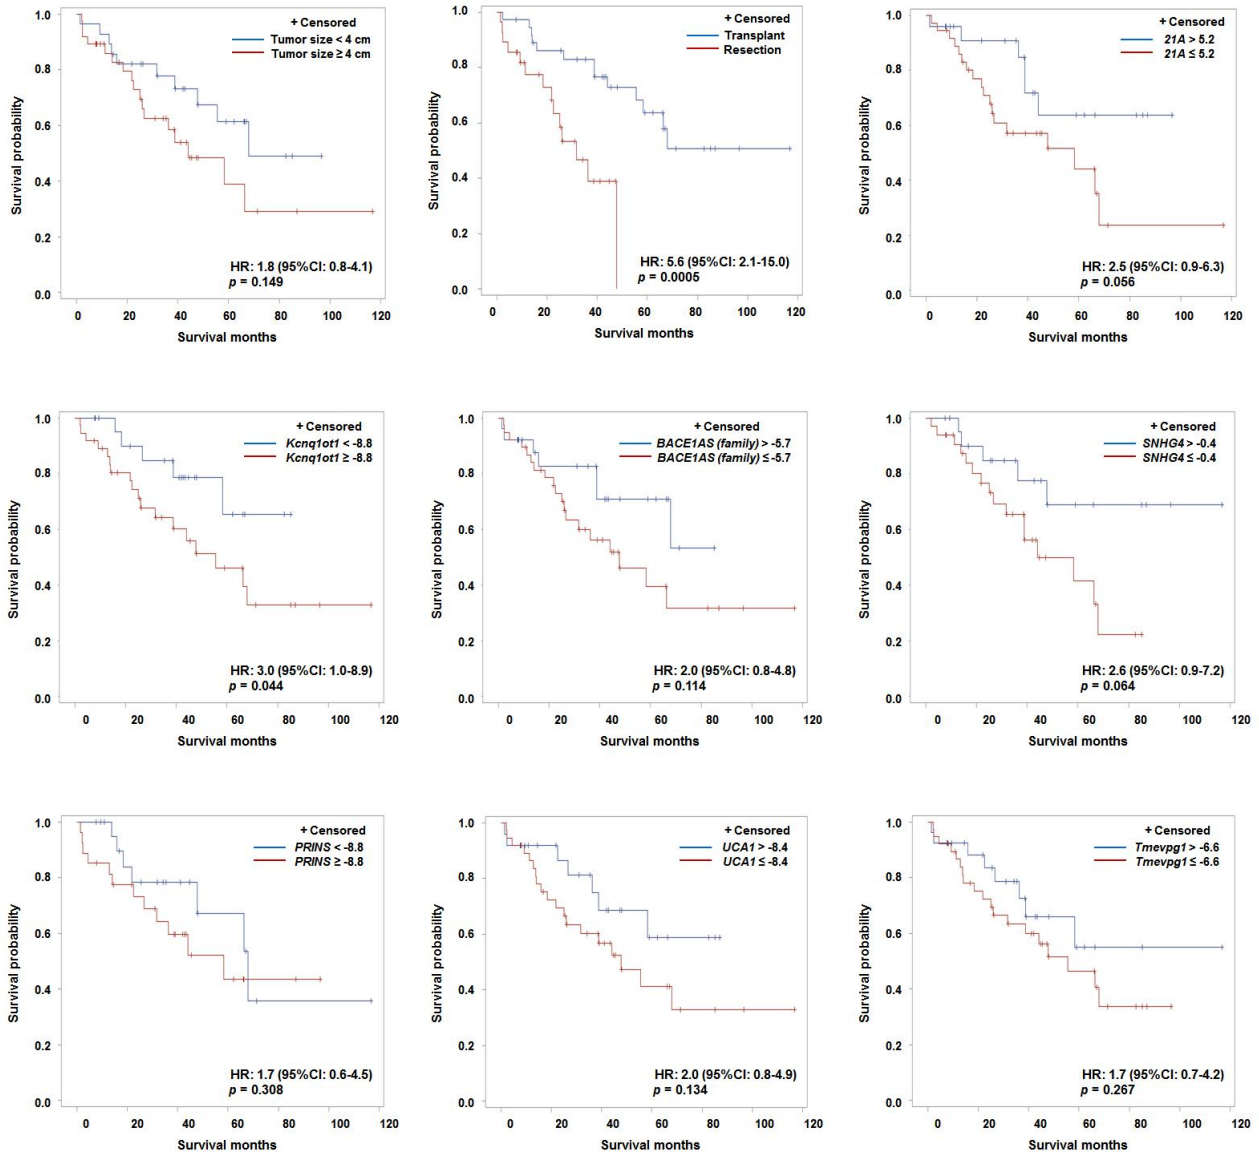

**Figure S3.** Expression of individual lncRNA (median expression level was used as the cutoff), tumor size ( $\geq 4$  cm vs. <4 cm) and treatment (resection vs. transplant) in prediction of HCC survival time. Seven lncRNAs (*Kcnq1ot1*, *21A*, *SNHG4*, *BACE1AS* (family), *PRINS*, *UCA1*, *Tmevpg1*) can individually predict a shorter HCC survival time with hazard ratios (HR) ranging from 1.7 to 3.0 adjusted for age and gender, similar to that for large tumor size (HR = 1.8, 95% CI: 0.8–4.1) and resection treatment (HR = 5.6, 95% CI: 2.1–15.0).

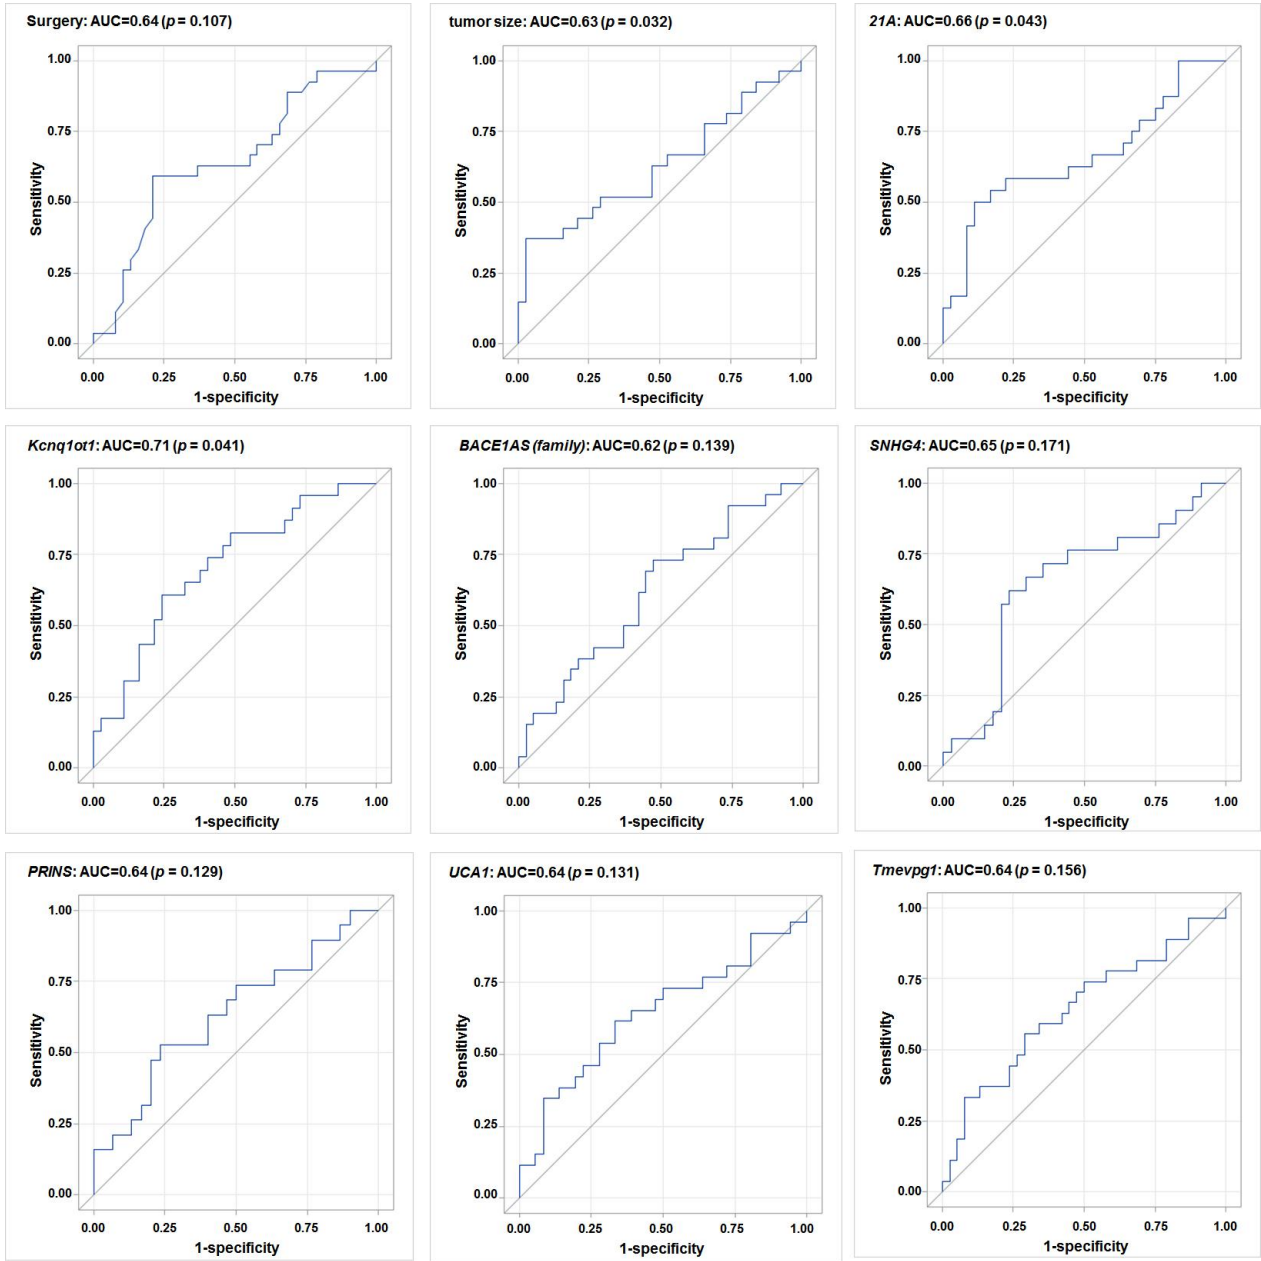

**Figure S4.** The ROC curves of individual lncRNAs, tumor size and treatment for HCC survival. The predictive accuracy for individual lncRNA ranges from 0.62 to 0.71, similar to the AUCs of large tumor size (0.63) and resection treatment (0.64) adjusted for age and gender.

**Table S1.** Name and location of lncRNAs detected in the Lnc Profiler™ qPCR Array.

|   | 1                    | 2                            | 3                               | 4                        | 5        | 6                 | 7         | 8      | 9          | 10               | 11              | 12                  |
|---|----------------------|------------------------------|---------------------------------|--------------------------|----------|-------------------|-----------|--------|------------|------------------|-----------------|---------------------|
| A | 21A                  | 7SK                          | 7SL                             | Air                      | AK023948 | Alpha 280         | Alpha 250 | ANRIL  | anti-NOS2A | antiPeg11        | BACE1AS         | BC200               |
| B | CAR<br>Intergenic 10 | DHFR upstream<br>transcripts | Dio3os                          | DISC2                    | DLG2AS   | E2F4<br>antisense | EgoA      | EGO B  | Emx2os     | Evf1 and<br>EVF2 | GAS5-<br>family | Gomafu              |
| C | H19                  | H19 antisense                | H19 upstream<br>conserved 1 & 2 | HAR1A                    | HAR1B    | HOTAIR            | HOTAIRM1  | HOTTIP | Hoxa1 1as  | HOXA3as          | HOXA6as         | HULC                |
| D | IGF2AS               | IPW                          | Jpx                             | Kcnq1ot1                 | KRASPI   | L1PA16            | p21       | RoR    | SFMBT2     | VLDLR            | LOC285194       | LUST                |
| E | Malat1               | mascRNA                      | MEG3                            | MEG9                     | MER11C   | ncR-uPAR          | NDM29     | NEAT1  | Nespas     | NRON             | NTT             | p53 mRNA            |
| F | PCGEM1               | PR antisense<br>transcripts  | PRINS                           | PSF<br>inhibiting<br>RNA | PTENP1   | RNCR3             | SAF       | SCA8   | snaR       | SNHG1            | SNHG3           | SNHG4               |
| G | SNHG5                | SNHG6                        | Sox2ot                          | SRA                      | ST7OT    | TEA<br>ncRNAs     | Tmevpg1   | TncRNA | Tsix       | TUG1             | UCA1            | UM9-5               |
| H | WT1-AS               | Xist                         | Y RNA-1                         | Zeb2NAT                  | Zfas1    | Zfx2as            | 18S rRNA  | RNU43  | GAPDH      | LAMIN<br>A/C     | U6              | No assay<br>control |

**Table S2.** Aberrant 7 lncRNAs in 65 HCC tumor tissues and prediction for HCC survival.

| lncRNAs                 | HCC Outcome |       | Fold-Change | Unadjusted <i>p</i> -value |
|-------------------------|-------------|-------|-------------|----------------------------|
|                         | Dead        | Alive |             |                            |
| <i>21A</i>              | 2.1         | 4.4   | -4.7        | 0.027                      |
| <i>Kcnq1ot1</i>         | -6.8        | -8.7  | 3.7         | 0.059                      |
| <i>SNHG4</i>            | -1.7        | -0.7  | -2.0        | 0.103                      |
| <i>BACE1AS (family)</i> | -6.9        | -5.6  | -2.4        | 0.115                      |
| <i>UCA1</i>             | -9.6        | -8.6  | -2.0        | 0.120                      |
| <i>PRINS</i>            | -7.7        | -9.0  | 2.5         | 0.131                      |
| <i>Tmevpg1</i>          | -7.9        | -6.9  | -2.1        | 0.139                      |
